# Supplementary material for: Effects of Long-Term Controlled-Release Urea on Soil Greenhouse Gas Emissions in an Open-Field Lettuce System
Source: MDPI journal article supplement (doi:10.3390/plants13081071), 2024-04-10
Supplement: s1 [file s1]

# Supplementary Materials:

**Table S1.** Changes in soil temperature, WFPS, and precipitation in lettuce growing seasons (means±SE).

| Year | Seasons | Index              | Seedling     | Lotus         | Heading       | Mature       |
|------|---------|--------------------|--------------|---------------|---------------|--------------|
| 2017 | Spring  | Temperature (°C)   | 13.35±1.61 b | 16.28±2.26 ab | 18.92±2.74 a  | 22.28±2.39 a |
|      |         | WFPS (%)           | 58.94±6.32 a | 63.27±5.24 a  | 61.32±5.16 a  | 57.20±5.87 a |
|      |         | Precipitation (mm) | 0            | 0.65          | 0.85          | 0.60         |
|      | Autumn  | Temperature (°C)   | 23.21±1.28 a | 19.45±1.78 ab | 17.64±2.84 b  | 15.23±2.98 b |
|      |         | WFPS (%)           | 67.56±3.76 a | 60.21±4.24 ab | 59.24±5.01 ab | 55.16±5.62 b |
|      |         | Precipitation (mm) | 31.9         | 20.80         | 8.30          | 1.20         |
| 2018 | Spring  | Temperature (°C)   | 12.38±2.04 b | 16.03±2.63 ab | 18.31±2.98 a  | 21.05±3.02 a |
|      |         | WFPS (%)           | 60.02±3.97 a | 63.24±4.39 a  | 62.45±4.58 a  | 58.21±3.98 a |
|      |         | Precipitation (mm) | 0            | 0             | 1.00          | 0.40         |
|      | Autumn  | Temperature (°C)   | 24.02±1.56 a | 20.23±2.19 ab | 18.03±2.75 b  | 15.65±3.04 b |
|      |         | WFPS (%)           | 65.45±2.98 a | 61.37±3.67 ab | 58.93±4.65 ab | 54.69±5.42 b |
|      |         | Precipitation (mm) | 29.8         | 19.40         | 10.30         | 0.90         |
| 2019 | Spring  | Temperature (°C)   | 14.03±3.01 b | 17.21±2.48 ab | 19.34±2.33 ab | 22.96±2.08 a |
|      |         | WFPS (%)           | 60.21±4.89 a | 62.56±5.07 a  | 57.89±4.32 a  | 53.57±5.26 a |
|      |         | Precipitation (mm) | 0            | 0.42          | 0             | 1.60         |
|      | Autumn  | Temperature (°C)   | 23.68±1.67 a | 20.88±2.21 ab | 17.84±2.67 ab | 16.01±2.96 b |
|      |         | WFPS (%)           | 66.38±2.89 a | 64.04±3.21a   | 60.56±4.68 a  | 59.21±5.22 a |
|      |         | Precipitation (mm) | 34.45        | 21.95         | 10.20         | 2.40         |
| 2020 | Spring  | Temperature (°C)   | 13.89±2.03 b | 16.98±2.71 ab | 18.55±2.41 a  | 22.01±2.52 a |
|      |         | WFPS (%)           | 56.84±6.42 a | 61.89±5.73 a  | 59.89±5.03 a  | 55.28±4.89 a |
|      |         | Precipitation (mm) | 0            | 0             | 1.20          | 2.89         |
|      | Autumn  | Temperature (°C)   | 23.78±1.56 a | 20.87±2.16 ab | 19.04±2.86 ab | 16.78±3.22 b |
|      |         | WFPS (%)           | 64.86±3.07 a | 62.01±4.65 a  | 59.56±5.21 a  | 56.78±5.77 a |
|      |         | Precipitation (mm) | 23.67        | 18.24         | 12.45         | 3.16         |
| 2021 | Spring  | Temperature (°C)   | 14.06±3.01 b | 16.98±2.45 ab | 19.63±2.23 ab | 22.57±1.78 a |
|      |         | WFPS (%)           | 60.06±4.56 a | 62.01±5.32 a  | 58.95±5.78 a  | 56.78±5.05 a |
|      |         | Precipitation (mm) | 0.42         | 0             | 1.52          | 1.06         |
|      | Autumn  | Temperature (°C)   | 24.02±1.67 a | 21.00±1.99 ab | 18.95±2.32 ab | 17.03±3.02 b |
|      |         | WFPS (%)           | 64.24±2.95 a | 61.89±3.64 a  | 60.33±4.85 a  | 57.97±5.28 a |
|      |         | Precipitation (mm) | 20.67        | 14.82         | 13.26         | 5.41         |

Daily average temperature and WFPS (water filled pore space) at 10:00-14:00 am during the growth stage. Same letter within row means no significant difference at the level of 0.05.
